# Supplementary material
Source: Springer Nature journal article supplement (https://www.springermedizin.de/resource/supplementary/12960_2008_209_MOESM2_ESM.pdf/9570660)
Supplement: MOESM2 [file 9570660]

# CENTRAL

DG CDC&EH

NTP MANAGER

TECHNICAL SUPPORT  
TEAM  
PMU

NATIONAL TRAINING COORDINATOR (TC)

TRAINING  
MANAGEMENT

FACILITATOR  
TC

# PROVINCE

PROVINCIAL TB MANAGER

PROVINCIAL TRAINING COORDINATOR

TRAINING TEAM  
PPO

TRAINING CENTER

MANAGEMENT

FACILITATOR

TARGET (TRAINEE)
